# Supplementary material for: Mutational mechanisms shaping the coding and noncoding genome of germinal center derived B-cell lymphomas
Source: PubMed Central journal article supplement (PMC8257491; doi:10.1038/s41375-021-01251-z), 2021-05-05
Supplement: 41375_2021_1251_MOESM4_ESM.pdf [file 41375_2021_1251_MOESM4_ESM.pdf]

Supplementary Table 1A. Clinico-biological characteristics

| ICGC-case | Age at diagnosis (years) | Sex | Tumor cell content based on WGS | RNA-available | molecular Burkitt index based classification (RNA-seq based gene expression classifier) | Diagnosis | Cell of origin (COO) based on RNAseq expression | Presence of chromosomal breakpoints / translocations based on FISH/WGS/RNA-Seq |             |             |            | IHC analysis    |                 |                |                 |                 |                 | in PCAWG |                 |
|-----------|--------------------------|-----|---------------------------------|---------------|-----------------------------------------------------------------------------------------|-----------|-------------------------------------------------|--------------------------------------------------------------------------------|-------------|-------------|------------|-----------------|-----------------|----------------|-----------------|-----------------|-----------------|----------|-----------------|
|           |                          |     |                                 |               |                                                                                         |           |                                                 | MYC status                                                                     | BCL2 status | BCL6 status | IGH Status | CD20 expression | CD10 expression | CD5 expression | BCL2 expression | BCL6 expression | MUM1 expression |          | KI67 expression |
| 4105105   | 40                       | f   | 0,77                            | yes           | non-BL                                                                                  | FL        | GCB                                             | negative                                                                       | positive    | negative    | positive   | 4               | 4               | n.a.           | 4               | 3               | 0               | 20%      | yes             |
| 4108101   | 66                       | m   | 0,51                            | yes           | non-BL                                                                                  | DLBCL     | ABC                                             | negative                                                                       | negative    | negative    | negative   | 4               | 0               | n.a.           | 4               | 1               | 4               | 80%      | yes             |
| 4121361   | 74                       | m   | 0,37                            | yes           | non-BL                                                                                  | FL        | GCB                                             | negative                                                                       | positive    | negative    | positive   | 4               | 4               | n.a.           | 4               | 5               | 0               | 30%      | yes             |
| 4134005   | 67                       | m   | 0,79                            | yes           | non-BL                                                                                  | FL        | GCB                                             | negative                                                                       | positive    | negative    | positive   | 4               | 4               | n.a.           | 4               | n.a.            | n.a.            | 20%      | yes             |
| 4135099   | 49                       | m   | 0,8                             | yes           | non-BL                                                                                  | DLBCL     | ABC                                             | negative                                                                       | negative    | positive    | positive   | 4               | 0               | n.a.           | 4               | 4               | 4               | 90%      | yes             |
| 4163639   | 75                       | f   | 0,6                             | yes           | non-BL                                                                                  | DLBCL     | GCB                                             | negative                                                                       | negative    | negative    | negative   | 4               | 4               | n.a.           | 4               | 1               | 5               | 20%      | yes             |
| 4101316   | 74                       | f   | 0,3                             | yes           | non-BL                                                                                  | DLBCL     | ABC                                             | negative                                                                       | negative    | negative    | negative   | 4               | 0               | n.a.           | 4               | 4               | 4               | 70%      | no              |
| 4158726   | 48                       | m   | 0,52                            | yes           | non-BL                                                                                  | FL        | GCB                                             | negative                                                                       | positive    | negative    | positive   | 4               | 4               | n.a.           | 3               | 4               | 2               | 50%      | yes             |
| 4159170   | 43                       | m   | 0,58                            | yes           | non-BL                                                                                  | FL        | GCB                                             | negative                                                                       | positive    | negative    | positive   | 4               | 4               | n.a.           | 4               | n.a.            | 1               | 30%      | yes             |
| 4175837   | 74                       | f   | 0,34                            | yes           | non-BL                                                                                  | FL        | Typelll                                         | negative                                                                       | positive    | positive    | positive   | 4               | 4               | n.a.           | 4               | 5               | 1               | n.a.     | yes             |
| 4177376   | 73                       | f   | 0,59                            | yes           | non-BL                                                                                  | FL-DLBCL  | Typelll                                         | negative                                                                       | positive    | negative    | positive   | 4               | 0               | n.a.           | 4               | n.a.            | n.a.            | 60%      | yes             |
| 4188900   | 76                       | m   | 0,52                            | yes           | non-BL                                                                                  | FL        | Typelll                                         | negative                                                                       | positive    | negative    | negative   | 4               | 4               | n.a.           | 4               | 2               | 1               | 30%      | yes             |
| 4189200   | 51                       | f   | 0,66                            | yes           | non-BL                                                                                  | FL        | GCB                                             | negative                                                                       | positive    | negative    | positive   | 4               | 3               | n.a.           | 4               | n.a.            | n.a.            | 10%      | yes             |
| 4131257   | 72                       | m   | 0,5                             | yes           | non-BL                                                                                  | DLBCL     | ABC                                             | negative                                                                       | negative    | positive    | positive   | 4               | 0               | n.a.           | 4               | 1               | 2               | 80%      | yes             |
| 4131744   | 68                       | m   | 0,52                            | yes           | non-BL                                                                                  | FL-DLBCL  | GCB                                             | negative                                                                       | positive    | negative    | positive   | 4               | 4               | n.a.           | 4               | 3               | 1               | 80%      | yes             |
| 4160468   | 62                       | m   | 0,62                            | yes           | non-BL                                                                                  | FL        | GCB                                             | negative                                                                       | positive    | negative    | positive   | 4               | 4               | n.a.           | 4               | 4               | 0               | 30%      | yes             |
| 4171706   | 70                       | f   | 0,61                            | yes           | non-BL                                                                                  | FL        | GCB                                             | negative                                                                       | positive    | negative    | positive   | 4               | 4               | n.a.           | 4               | 3               | 1               | 10%      | yes             |
| 4174905   | 72                       | m   | 0,57                            | yes           | non-BL                                                                                  | FL        | Typelll                                         | negative                                                                       | positive    | negative    | positive   | 4               | 4               | n.a.           | 4               | 4               | 0               | 10%      | yes             |
| 4177987   | 71                       | m   | 0,4                             | yes           | non-BL                                                                                  | FL        | GCB                                             | negative                                                                       | positive    | negative    | positive   | 4               | 3               | n.a.           | 4               | 4               | 1               | 20%      | yes             |
| 4102009   | 64                       | m   | 0,71                            | yes           | non-BL                                                                                  | DLBCL     | ABC                                             | negative                                                                       | negative    | negative    | negative   | 4               | 0               | n.a.           | 4               | 3               | 4               | 90%      | no              |
| 4107137   | 59                       | m   | 0,41                            | yes           | non-BL                                                                                  | DLBCL     | GCB                                             | negative                                                                       | negative    | positive    | positive   | 4               | 0               | n.a.           | 4               | 3               | 4               | 70%      | no              |

|         |    |   |      |     |              |          |         |                   |          |          |          |   |   |      |   |      |      |      |     |
|---------|----|---|------|-----|--------------|----------|---------|-------------------|----------|----------|----------|---|---|------|---|------|------|------|-----|
| 4120193 | 41 | f | 0,47 | yes | non-BL       | DLBCL    | ABC     | negative          | negative | negative | negative | 4 | 0 | n.a. | 4 | 1    | 3    | 70%  | yes |
| 4139696 | 70 | m | 0,46 | yes | non-BL       | DLBCL    | Typelll | negative          | negative | positive | positive | 4 | 4 | 0    | 0 | 4    | 0    | 90%  | yes |
| 4166706 | 62 | m | 0,53 | no  | NA           | DLBCL    | n.a.    | negative          | negative | positive | positive | 4 | 0 | n.a. | 1 | 4    | 4    | 90%  | yes |
| 4170686 | 56 | m | 0,55 | yes | non-BL       | FL       | GCB     | negative          | positive | negative | positive | 4 | 0 | n.a. | 4 | 3    | 0    | 10%  | yes |
| 4176133 | 61 | f | 0,77 | yes | non-BL       | DLBCL    | ABC     | negative          | negative | positive | positive | 4 | 0 | n.a. | 4 | 4    | 0    | 50%  | yes |
| 4177601 | 52 | f | 0,3  | yes | non-BL       | FL       | GCB     | negative          | positive | negative | positive | 4 | 4 | n.a. | 4 | 4    | 1    | 30%  | yes |
| 4184094 | 57 | f | 0,79 | yes | non-BL       | DLBCL    | GCB     | negative          | positive | negative | positive | 4 | 4 | n.a. | 4 | 4    | 1    | 80%  | yes |
| 4112447 | 46 | m | 0,63 | yes | non-BL       | FL       | GCB     | negative          | positive | positive | positive | 4 | 4 | n.a. | 2 | 3    | 2    | 10%  | no  |
| 4113825 | 74 | f | 0,64 | yes | non-BL       | FL       | GCB     | negative          | positive | negative | positive | 4 | 2 | n.a. | 0 | 2    | 1    | 40%  | no  |
| 4115001 | 70 | f | 0,45 | yes | non-BL       | DLBCL    | GCB     | negative          | positive | negative | positive | 4 | 0 | 4    | 4 | 3    | 0    | 10%  | no  |
| 4119279 | 62 | f | 0,84 | yes | non-BL       | DLBCL    | ABC     | negative          | negative | negative | negative | 4 | 0 | 0    | 1 | 1    | 4    | 90%  | no  |
| 4120157 | 46 | m | 0,61 | yes | non-BL       | DLBCL    | GCB     | negative          | negative | negative | positive | 4 | 0 | n.a. | 2 | 4    | 0    | 70%  | no  |
| 4133263 | 40 | m | 0,68 | yes | intermediate | DLBCL    | GCB     | non-IG-MYC<br>pos | negative | negative | positive | 4 | 4 | 0    | 1 | 4    | 0    | 90%  | yes |
| 4134434 | 84 | m | 0,86 | yes | non-BL       | DLBCL    | GCB     | negative          | positive | positive | positive | 4 | 0 | n.a. | 3 | 4    | 4    | 90%  | yes |
| 4142605 | 76 | f | 0,79 | yes | non-BL       | FL-DLBCL | GCB     | negative          | positive | negative | positive | 4 | 5 | n.a. | 4 | 4    | 1    | 30%  | yes |
| 4145056 | 67 | f | 0,69 | yes | non-BL       | FL       | Typelll | negative          | positive | negative | positive | 4 | 4 | n.a. | 2 | 4    | 4    | 100% | yes |
| 4145177 | 75 | f | 0,8  | yes | non-BL       | FL-DLBCL | GCB     | negative          | positive | negative | positive | 4 | 4 | 0    | 4 | 4    | 0    | 50%  | yes |
| 4149246 | 41 | m | 0,68 | yes | non-BL       | FL       | GCB     | negative          | positive | positive | positive | 4 | 4 | 0    | 4 | 3    | 2    | 10%  | yes |
| 4157186 | 74 | m | 0,75 | yes | non-BL       | DLBCL    | ABC     | negative          | negative | negative | negative | 4 | 0 | 0    | 4 | 2    | 3    | 70%  | yes |
| 4159421 | 78 | f | 0,34 | yes | non-BL       | DLBCL    | GCB     | negative          | negative | negative | negative | 4 | 4 | n.a. | 4 | 3    | 2    | 10%  | yes |
| 4177810 | 47 | f | 0,64 | yes | non-BL       | FL       | Typelll | negative          | positive | negative | positive | 4 | 4 | n.a. | 4 | 4    | 0    | 20%  | yes |
| 4178655 | 50 | m | 0,72 | yes | non-BL       | FL       | GCB     | negative          | positive | negative | positive | 4 | 4 | 0    | 4 | 3    | 0    | 30%  | yes |
| 4189035 | 46 | m | 0,49 | yes | non-BL       | DLBCL    | ABC     | negative          | negative | negative | negative | 4 | 0 | 0    | 4 | 1    | 3    | 90%  | yes |
| 4198542 | 68 | f | 0,3  | yes | non-BL       | FL       | ABC     | negative          | negative | negative | negative | 4 | 1 | n.a. | 2 | 3    | 3    | 40%  | yes |
| 4188879 | 52 | m | 0,62 | yes | non-BL       | DLBCL    | ABC     | non-IG-MYC<br>pos | negative | negative | positive | 4 | 0 | n.a. | 4 | 4    | 4    | 70%  | yes |
| 4166503 | 43 | m | 0,81 | yes | non-BL       | FL       | GCB     | negative          | positive | negative | positive | 4 | 4 | n.a. | 3 | n.a. | n.a. | 30%  | yes |
| 4110378 | 69 | f | 0,64 | yes | non-BL       | FL       | GCB     | negative          | positive | negative | positive | 4 | 0 | n.a. | 3 | 4    | 2    | 80%  | no  |
| 4142761 | 63 | m | 0,8  | yes | non-BL       | FL       | GCB     | negative          | positive | negative | positive | 4 | 4 | n.a. | 4 | 3    | 1    | 20%  | no  |
| 4109956 | 54 | f | 0,81 | yes | non-BL       | FL       | GCB     | negative          | positive | positive | positive | 4 | 4 | n.a. | 4 | 5    | 1    | 10%  | no  |
| 4128477 | 54 | m | 0,57 | yes | non-BL       | FL       | GCB     | negative          | positive | negative | positive | 4 | 4 | n.a. | 4 | 3    | 1    | 30%  | no  |

|          |    |   |      |     |              |          |         |                |                  |          |                  |   |   |      |   |   |   |     |     |
|----------|----|---|------|-----|--------------|----------|---------|----------------|------------------|----------|------------------|---|---|------|---|---|---|-----|-----|
| 4184011  | 61 | m | 0,3  | yes | non-BL       | FL       | GCB     | negative       | not-determinable | negative | not-determinable | 4 | 4 | n.a. | 0 | 2 | 1 | 50% | yes |
| 4197155  | 70 | f | 0,4  | yes | non-BL       | DLBCL    | Typelll | negative       | negative         | positive | positive         | 3 | 0 | n.a. | 3 | 4 | 4 | 70% | yes |
| 4138885  | 55 | f | 0,3  | yes | non-BL       | FL       | GCB     | negative       | negative         | negative | negative         | 4 | 0 | 0    | 0 | 1 | 0 | 60% | no  |
| 4181460  | 70 | f | 0,44 | no  | NA           | DLBCL    | n.a.    | negative       | negative         | positive | positive         | 4 | 0 | 0    | 4 | 4 | 3 | 90% | yes |
| 4136702  | 75 | f | 0,82 | yes | non-BL       | FL-DLBCL | GCB     | negative       | positive         | negative | positive         | 4 | 4 | n.a. | 4 | 4 | 1 | 50% | no  |
| 4110120  | 68 | m | 0,52 | yes | non-BL       | FL-DLBCL | GCB     | negative       | negative         | positive | positive         | 4 | 0 | 0    | 4 | 2 | 4 | 70% | no  |
| 4177406  | 72 | f | 0,58 | yes | non-BL       | FL       | GCB     | negative       | positive         | negative | positive         | 4 | 4 | n.a. | 4 | 3 | 0 | 20% | yes |
| 4187640  | 58 | m | 0,72 | yes | non-BL       | DLBCL    | GCB     | negative       | negative         | positive | positive         | 4 | 0 | 0    | 2 | 4 | 1 | 90% | yes |
| 4124188  | 73 | m | 0,76 | yes | non-BL       | DLBCL    | GCB     | negative       | negative         | negative | negative         | 4 | 4 | n.a. | 4 | 4 | 1 | 80% | no  |
| 4130194  | 55 | f | 0,85 | yes | non-BL       | DLBCL    | GCB     | non-IG-MYC pos | positive         | negative | positive         | 4 | 4 | n.a. | 3 | 4 | 4 | 80% | no  |
| 4138527  | 85 | f | 0,72 | yes | non-BL       | DLBCL    | GCB     | negative       | positive         | negative | positive         | 4 | 0 | n.a. | 4 | 4 | 0 | 90% | no  |
| 4147968  | 65 | f | 0,67 | yes | non-BL       | DLBCL    | Typelll | negative       | positive         | negative | positive         | 4 | 4 | n.a. | 4 | 2 | 4 | 90% | no  |
| 4103141  | 60 | f | 0,3  | yes | non-BL       | FL       | GCB     | non-IG-MYC pos | positive         | positive | positive         | 4 | 4 | 0    | 4 | 4 | 0 | 10% | no  |
| 4108992  | 68 | m | 0,77 | yes | non-BL       | FL       | GCB     | negative       | positive         | positive | positive         | 4 | 4 | 0    | 4 | 4 | 1 | 10% | no  |
| 4111326  | 74 | f | 0,72 | yes | non-BL       | DLBCL    | GCB     | non-IG-MYC pos | positive         | negative | positive         | 4 | 4 | 0    | 4 | 4 | 0 | 80% | no  |
| 4111337  | 79 | f | 0,61 | yes | non-BL       | FL-DLBCL | ABC     | negative       | negative         | positive | positive         | 4 | 0 | n.a. | 4 | 4 | 4 | 90% | no  |
| 4113191  | 62 | f | 0,65 | yes | non-BL       | FL       | GCB     | negative       | positive         | negative | positive         | 4 | 4 | n.a. | 4 | 4 | 0 | 10% | no  |
| 4124542  | 72 | f | 0,33 | yes | non-BL       | FL       | GCB     | negative       | positive         | negative | positive         | 4 | 4 | 0    | 4 | 4 | 1 | 10% | no  |
| 4131095  | 56 | f | 0,35 | yes | non-BL       | FL       | GCB     | negative       | negative         | negative | positive         | 4 | 0 | n.a. | 0 | 4 | 0 | 60% | no  |
| 4144951  | 62 | f | 0,72 | yes | non-BL       | FL-DLBCL | GCB     | negative       | positive         | negative | positive         | 4 | 4 | n.a. | 4 | 4 | 0 | 70% | no  |
| 4145528  | 62 | m | 0,49 | yes | non-BL       | DLBCL    | GCB     | negative       | negative         | negative | negative         | 4 | 0 | n.a. | 4 | 4 | 4 | 70% | no  |
| 4147081  | 42 | f | 0,79 | yes | non-BL       | FL       | ABC     | negative       | positive         | positive | positive         | 4 | 4 | 0    | 4 | 2 | 0 | 40% | no  |
| 4150549* | 76 | f | 0,66 | yes | non-BL       | FL       | GCB     | negative       | positive         | positive | positive         | 4 | 4 | n.a. | 4 | 4 | 0 | 10% | no  |
| 4161781  | 36 | f | 0,43 | yes | non-BL       | DLBCL    | GCB     | negative       | negative         | negative | negative         | 4 | 0 | 0    | 1 | 1 | 1 | 30% | no  |
| 4165379  | 64 | f | 0,3  | yes | non-BL       | FL       | GCB     | negative       | negative         | negative | negative         | 4 | 4 | n.a. | 1 | 4 | 1 | 30% | no  |
| 4166151  | 74 | f | 0,84 | yes | BL           | DH-BL    | GCB     | non-IG-MYC pos | positive         | negative | positive         | 4 | 4 | n.a. | 4 | 4 | 0 | 90% | no  |
| 4193638  | 55 | f | 0,76 | yes | non-BL       | DLBCL    | ABC     | negative       | negative         | positive | positive         | 4 | 0 | n.a. | 4 | 4 | 4 | 80% | yes |
| 4199714  | 53 | f | 0,69 | yes | non-BL       | DLBCL    | ABC     | negative       | negative         | positive | negative         | 4 | 0 | 0    | 0 | 4 | 4 | 90% | yes |
| 4199996  | 73 | m | 0,46 | yes | non-BL       | FL       | GCB     | negative       | positive         | negative | positive         | 4 | 4 | n.a. | 4 | 4 | 0 | 30% | yes |
| 4107559  | 72 | m | 0,77 | yes | intermediate | DLBCL    | GCB     | non-IG-MYC pos | positive         | negative | positive         | 4 | 4 | n.a. | 4 | 4 | 1 | 90% | no  |

|         |    |   |      |     |              |          |         |                |          |          |                  |   |   |      |   |      |      |      |     |
|---------|----|---|------|-----|--------------|----------|---------|----------------|----------|----------|------------------|---|---|------|---|------|------|------|-----|
| 4113971 | 61 | f | 0,37 | yes | non-BL       | FL-DLBCL | GCB     | negative       | negative | positive | positive         | 4 | 0 | n.a. | 2 | 4    | 3    | 70%  | no  |
| 4122063 | 47 | m | 0,54 | yes | intermediate | DLBCL    | GCB     | non-IG-MYC pos | positive | negative | positive         | 4 | 4 | n.a. | 4 | 4    | 0    | 30%  | no  |
| 4128852 | 57 | f | 0,57 | yes | non-BL       | DLBCL    | ABC     | negative       | negative | negative | negative         | 4 | 4 | 0    | 4 | 4    | 4    | 80%  | no  |
| 4140531 | 66 | m | 0,67 | yes | non-BL       | DLBCL    | GCB     | negative       | negative | negative | negative         | 4 | 4 | n.a. | 5 | 4    | 3    | 100% | no  |
| 4158268 | 54 | f | 0,3  | yes | non-BL       | FL       | GCB     | negative       | positive | negative | positive         | 4 | 4 | 0    | 4 | 4    | 0    | 20%  | no  |
| 4198519 | 67 | f | 0,3  | yes | non-BL       | DLBCL    | GCB     | negative       | negative | positive | positive         | 4 | 4 | n.a. | 0 | 3    | 1    | 80%  | yes |
| 4101626 | 68 | m | 0,6  | yes | non-BL       | FL       | GCB     | negative       | positive | negative | positive         | 3 | 4 | n.a. | 4 | 3    | 1    | 20%  | no  |
| 4104105 | 64 | m | 0,32 | yes | non-BL       | DLBCL    | GCB     | negative       | negative | negative | negative         | 4 | 0 | n.a. | 4 | 4    | 2    | 80%  | no  |
| 4105746 | 58 | m | 0,71 | yes | non-BL       | DLBCL    | Typelll | negative       | negative | negative | negative         | 4 | 0 | n.a. | 4 | 1    | 2    | 90%  | no  |
| 4108988 | 55 | m | 0,44 | yes | non-BL       | FL       | GCB     | negative       | negative | negative | negative         | 4 | 4 | n.a. | 4 | 4    | n.a. | 10%  | no  |
| 4109142 | 74 | f | 0,6  | yes | non-BL       | FL       | GCB     | negative       | negative | positive | positive         | 4 | 4 | n.a. | 3 | 3    | 1    | 10%  | no  |
| 4109808 | 63 | m | 0,79 | yes | non-BL       | DLBCL    | GCB     | negative       | positive | negative | positive         | 4 | 4 | n.a. | 4 | 4    | n.a. | 30%  | no  |
| 4117030 | 58 | m | 0,84 | yes | non-BL       | DLBCL    | ABC     | negative       | negative | negative | negative         | 4 | 0 | n.a. | 4 | 2    | 1    | 60%  | no  |
| 4120468 | 80 | f | 0,47 | yes | non-BL       | FL       | GCB     | negative       | positive | positive | positive         | 4 | 4 | 0    | 4 | 4    | 0    | 10%  | no  |
| 4128970 | 61 | f | 0,56 | yes | non-BL       | FL       | GCB     | negative       | positive | positive | positive         | 4 | 4 | n.a. | 4 | 3    | 1    | 10%  | no  |
| 4130051 | 74 | f | 0,8  | yes | non-BL       | DLBCL    | ABC     | non-IG-MYC pos | negative | negative | positive         | 4 | 0 | n.a. | 4 | 4    | 3    | 60%  | no  |
| 4138464 | 47 | f | 0,9  | yes | non-BL       | DLBCL    | Typelll | IGL-MYC pos    | positive | negative | positive         | 4 | 0 | n.a. | 1 | 3    | n.a. | 80%  | no  |
| 4145391 | 73 | m | 0,86 | yes | non-BL       | FL       | GCB     | negative       | positive | positive | positive         | 4 | 4 | 0    | 4 | 4    | 4    | 70%  | no  |
| 4148771 | 64 | f | 0,69 | yes | non-BL       | FL       | GCB     | negative       | positive | negative | positive         | 4 | 4 | n.a. | 4 | 3    | 0    | 30%  | no  |
| 4158483 | 46 | m | 0,72 | yes | non-BL       | FL       | Typelll | negative       | positive | negative | positive         | 4 | 4 | n.a. | 4 | 2    | 1    | 20%  | no  |
| 4163297 | 47 | m | 0,61 | yes | non-BL       | FL       | Typelll | negative       | positive | positive | positive         | 4 | 4 | n.a. | 2 | 5    | 1    | 30%  | no  |
| 4168738 | 50 | m | 0,45 | yes | non-BL       | DLBCL    | Typelll | negative       | negative | positive | positive         | 4 | 0 | n.a. | 3 | 4    | 1    | 90%  | no  |
| 4171810 | 52 | f | 0,62 | yes | non-BL       | DLBCL    | GCB     | IGK-MYC pos    | positive | negative | positive         | 4 | 4 | n.a. | 3 | 3    | 2    | 30%  | no  |
| 4173863 | 53 | f | 0,36 | yes | non-BL       | DLBCL    | ABC     | negative       | negative | positive | positive         | 4 | 4 | n.a. | 4 | 5    | 4    | 80%  | no  |
| 4176325 | 80 | f | 0,63 | yes | non-BL       | DLBCL    | GCB     | negative       | negative | negative | negative         | 4 | 4 | n.a. | 0 | n.a. | n.a. | 80%  | no  |
| 4177175 | 74 | f | 0,72 | yes | non-BL       | FL       | GCB     | negative       | positive | negative | positive         | 4 | 4 | n.a. | 4 | 4    | 0    | 80%  | no  |
| 4179894 | 72 | m | 0,79 | yes | non-BL       | DLBCL    | ABC     | negative       | negative | negative | not-determinable | 4 | 4 | 0    | 0 | n.a. | n.a. | 90%  | no  |
| 4181037 | 70 | f | 0,68 | yes | non-BL       | FL       | ABC     | negative       | negative | negative | negative         | 4 | 0 | 0    | 4 | 4    | n.a. | 40%  | no  |
| 4183136 | 55 | m | 0,54 | yes | non-BL       | DLBCL    | ABC     | negative       | negative | negative | negative         | 4 | 2 | 0    | 1 | 2    | n.a. | 60%  | no  |
| 4183924 | 72 | f | 0,76 | yes | non-BL       | FL-DLBCL | GCB     | non-IG-MYC pos | positive | negative | positive         | 4 | 4 | n.a. | 4 | 4    | 0    | 60%  | no  |

|         |    |   |      |     |        |          |         |                  |          |          |          |   |      |      |   |   |      |      |    |
|---------|----|---|------|-----|--------|----------|---------|------------------|----------|----------|----------|---|------|------|---|---|------|------|----|
| 4188800 | 34 | f | 0,33 | yes | non-BL | FL       | GCB     | negative         | positive | negative | positive | 4 | 4    | n.a. | 4 | 5 | 1    | 70%  | no |
| 4135278 | 43 | f | 0,3  | yes | non-BL | DLBCL    | GCB     | negative         | negative | negative | positive | 4 | 0    | n.a. | 4 | 2 | 1    | 70%  | no |
| 4132950 | 76 | m | 0,5  | yes | non-BL | FL-DLBCL | GCB     | negative         | positive | negative | positive | 4 | 4    | n.a. | 4 | 4 | 0    | 60%  | no |
| 4101815 | 69 | f | 0,65 | yes | non-BL | FL       | GCB     | negative         | positive | negative | positive | 4 | 4    | n.a. | 4 | 3 | 0    | 40%  | no |
| 4113140 | 43 | m | 0,41 | yes | non-BL | DLBCL    | Typelll | negative         | negative | positive | positive | 4 | 0    | n.a. | 0 | 0 | 0    | 40%  | no |
| 4151028 | 67 | f | 0,56 | yes | non-BL | FL       | GCB     | negative         | positive | negative | positive | 4 | 4    | n.a. | 4 | 3 | 0    | n.a. | no |
| 4138652 | 45 | m | 0,51 | yes | non-BL | FL       | GCB     | negative         | positive | negative | positive | 4 | 4    | 0    | 4 | 4 | 0    | 10%  | no |
| 4141476 | 79 | f | 0,3  | yes | non-BL | DLBCL    | ABC     | negative         | negative | positive | positive | 4 | 0    | n.a. | 4 | 4 | n.a. | 30%  | no |
| 4144366 | 40 | m | 0,73 | yes | non-BL | FL       | GCB     | negative         | positive | negative | positive | 4 | 4    | n.a. | 4 | 3 | 1    | 20%  | no |
| 4199848 | 33 | m | 0,56 | yes | non-BL | FL       | GCB     | negative         | positive | negative | positive | 4 | 4    | n.a. | 4 | 3 | 1    | 30%  | no |
| 4121263 | 64 | f | 0,41 | yes | non-BL | FL       | GCB     | negative         | negative | positive | positive | 4 | 4    | n.a. | 0 | 4 | 0    | 10%  | no |
| 4144131 | 75 | m | 0,63 | yes | non-BL | FL-DLBCL | GCB     | IGK-MYC pos      | positive | negative | positive | 4 | 4    | 0    | 4 | 4 | 0    | 10%  | no |
| 4148261 | 61 | f | 0,33 | yes | non-BL | FL       | GCB     | negative         | positive | negative | positive | 4 | 4    | n.a. | 4 | 3 | 0    | 10%  | no |
| 4108588 | 62 | m | 0,38 | yes | non-BL | FL       | GCB     | negative         | positive | positive | positive | 4 | 4    | n.a. | 4 | 3 | 1    | 20%  | no |
| 4107990 | 45 | f | 0,59 | yes | non-BL | DLBCL    | GCB     | negative         | positive | negative | positive | 4 | 4    | 0    | 4 | 4 | 0    | 90%  | no |
| 4100636 | 43 | m | 0,59 | yes | non-BL | FL-DLBCL | Typelll | negative         | negative | positive | positive | 4 | n.a. | n.a. | 4 | 2 | 0    | 10%  | no |
| 4119463 | 51 | f | 0,55 | yes | non-BL | FL       | GCB     | non-determinable | positive | negative | positive | 4 | 4    | 0    | 4 | 4 | 0    | 10%  | no |
| 4116268 | 52 | m | 0,52 | yes | non-BL | DLBCL    | GCB     | negative         | negative | positive | positive | 4 | 0    | n.a. | 4 | 1 | 0    | 30%  | no |
| 4123945 | 57 | f | 0,76 | yes | non-BL | FL       | GCB     | negative         | positive | negative | positive | 4 | 4    | 0    | 4 | 4 | 0    | 10%  | no |
| 4124795 | 75 | f | 0,49 | yes | non-BL | FL       | GCB     | negative         | positive | negative | positive | 4 | 4    | n.a. | 4 | 4 | 2    | 10%  | no |
| 4131738 | 45 | m | 0,64 | yes | non-BL | FL       | Typelll | negative         | positive | negative | positive | 4 | 4    | n.a. | 4 | 4 | n.a. | 10%  | no |
| 4158933 | 67 | m | 0,53 | yes | non-BL | DLBCL    | Typelll | negative         | positive | negative | positive | 4 | 4    | n.a. | 4 | 3 | 1    | 80%  | no |
| 4133863 | 56 | m | 0,49 | yes | non-BL | FL       | GCB     | negative         | positive | negative | positive | 4 | 4    | 0    | 4 | 2 | 0    | 10%  | no |
| 4160069 | 51 | f | 0,76 | yes | non-BL | FL       | GCB     | negative         | positive | negative | positive | 4 | 4    | n.a. | 4 | 4 | 0    | 10%  | no |
| 4162154 | 51 | f | 0,56 | yes | non-BL | FL       | GCB     | negative         | positive | negative | positive | 4 | 4    | 0    | 4 | 4 | 0    | 10%  | no |
| 4167381 | 68 | m | NA   | yes | non-BL | DLBCL    | GCB     | negative         | negative | positive | positive | 4 | 0    | n.a. | 0 | 1 | 0    | 80%  | no |
| 4166940 | 46 | m | 0,3  | yes | non-BL | DLBCL    | ABC     | negative         | negative | positive | positive | 4 | 0    | n.a. | 4 | 0 | n.a. | 0%   | no |
| 4169012 | 60 | f | 0,32 | yes | non-BL | DLBCL    | ABC     | negative         | negative | negative | negative | 4 | 4    | 0    | 4 | 4 | 4    | 80%  | no |
| 4177639 | 77 | f | 0,71 | yes | non-BL | FL-DLBCL | GCB     | negative         | positive | positive | positive | 4 | 4    | 0    | 4 | 2 | 0    | 50%  | no |
| 4170577 | 89 | f | 0,3  | yes | non-BL | DLBCL    | GCB     | non-IG-MYC pos   | positive | negative | positive | 4 | 4    | n.a. | 4 | 3 | 0    | 40%  | no |

|         |    |   |      |     |        |          |         |                   |          |          |          |      |      |      |      |      |      |      |    |
|---------|----|---|------|-----|--------|----------|---------|-------------------|----------|----------|----------|------|------|------|------|------|------|------|----|
| 4193646 | 33 | m | 0,32 | yes | non-BL | DLBCL    | GCB     | negative          | negative | negative | negative | 4    | 0    | n.a. | 4    | 4    | 2    | 80%  | no |
| 4105782 | 57 | m | 0,3  | yes | non-BL | FL       | GCB     | negative          | positive | negative | positive | 4    | 0    | n.a. | 4    | 2    | 1    | 30%  | no |
| 4118156 | 71 | f | 0,55 | yes | non-BL | FL       | GCB     | negative          | positive | negative | positive | 4    | 4    | 0    | 4    | 4    | 0    | 20%  | no |
| 4119702 | 74 | m | 0,64 | yes | non-BL | FL       | GCB     | negative          | positive | negative | positive | 4    | 4    | 1    | 4    | 4    | 0    | 10%  | no |
| 4103627 | 51 | f | 0,3  | yes | non-BL | FL       | GCB     | negative          | positive | negative | positive | 4    | 4    | 0    | 4    | 4    | 0    | 20%  | no |
| 4130865 | 54 | m | 0,2  | yes | non-BL | DLBCL    | GCB     | negative          | negative | positive | positive | 4    | 4    | n.a. | 2    | 3    | 3    | 90%  | no |
| 4128435 | 53 | f | 0,42 | yes | non-BL | FL       | GCB     | negative          | positive | negative | positive | 4    | 4    | n.a. | 4    | 4    | 0    | 20%  | no |
| 4128355 | 75 | m | 0,38 | yes | non-BL | FL       | GCB     | negative          | positive | positive | positive | 4    | 4    | n.a. | 2    | 3    | 1    | 20%  | no |
| 4124432 | 64 | f | 0,62 | yes | non-BL | FL       | Typelll | negative          | positive | positive | positive | 4    | 3    | n.a. | 4    | 3    | 0    | 10%  | no |
| 4121974 | 74 | f | 0,38 | yes | non-BL | FL       | GCB     | negative          | positive | negative | positive | 4    | 3    | n.a. | 4    | 4    | 1    | 20%  | no |
| 4120879 | 53 | m | 0,65 | yes | non-BL | FL       | ABC     | negative          | positive | negative | positive | 4    | 4    | n.a. | 4    | 3    | 2    | 10%  | no |
| 4114033 | 71 | m | 0,73 | yes | non-BL | DLBCL    | Typelll | negative          | negative | negative | negative | 4    | 4    | n.a. | 0    | 3    | n.a. | 60%  | no |
| 4112817 | 49 | m | 0,75 | yes | non-BL | FL       | GCB     | negative          | positive | negative | negative | 4    | 4    | 0    | 4    | 4    | 0    | 10%  | no |
| 4100049 | 76 | m | 0,65 | yes | non-BL | FL       | GCB     | negative          | positive | negative | positive | 4    | 4    | n.a. | 4    | 3    | 0    | 10%  | no |
| 4121621 | 57 | m | 0,62 | yes | non-BL | DLBCL    | GCB     | non-IG-MYC<br>pos | negative | negative | negative | 4    | 0    | n.a. | 4    | 4    | 4    | 80%  | no |
| 4128849 | 54 | f | 0,57 | yes | non-BL | DLBCL    | Typelll | negative          | negative | negative | negative | 4    | 0    | n.a. | 1    | 1    | 1    | 50%  | no |
| 4139483 | 64 | f | 0,5  | yes | non-BL | FL       | GCB     | negative          | positive | positive | positive | 4    | 4    | n.a. | 4    | 3    | 1    | 20%  | no |
| 4131213 | 71 | f | 0,34 | yes | non-BL | FL-DLBCL | Typelll | negative          | negative | positive | positive | 4    | 0    | 0    | 4    | 3    | n.a. | 40%  | no |
| 4136095 | 78 | f | 0,61 | no  | NA     | FL       | n.a.    | negative          | positive | negative | positive | 4    | 4    | n.a. | 4    | 4    | 0    | 20%  | no |
| 4138059 | 73 | f | 0,51 | yes | non-BL | FL       | GCB     | negative          | positive | negative | negative | 4    | 4    | n.a. | 4    | 3    | 0    | n.a. | no |
| 4184437 | 70 | f | 0,73 | yes | non-BL | FL-DLBCL | GCB     | negative          | positive | negative | positive | 4    | 0    | n.a. | 4    | 4    | n.a. | 40%  | no |
| 4126692 | 65 | f | 0,46 | yes | non-BL | FL       | Typelll | negative          | negative | positive | negative | 4    | 0    | 0    | 2    | 1    | 1    | 10%  | no |
| 4139212 | 72 | f | 0,4  | yes | non-BL | FL       | GCB     | negative          | positive | negative | positive | 4    | 4    | n.a. | 4    | 4    | 0    | 20%  | no |
| 4140544 | 74 | f | 0,58 | yes | non-BL | DLBCL    | ABC     | negative          | negative | negative | negative | 4    | 0    | 4    | 4    | 0    | 4    | 50%  | no |
| 4146301 | 69 | f | 0,49 | yes | non-BL | DLBCL    | GCB     | negative          | negative | negative | negative | 4    | 0    | n.a. | 0    | 0    | 0    | 90%  | no |
| 4147360 | 62 | f | 0,51 | yes | non-BL | FL       | GCB     | negative          | positive | negative | positive | 4    | 4    | 0    | 4    | 4    | 0    | 10%  | no |
| 4137230 | 59 | f | 0,3  | yes | non-BL | DLBCL    | Typelll | negative          | negative | positive | positive | 4    | 0    | 0    | 4    | 4    | 4    | 80%  | no |
| 4171946 | 47 | m | 0,35 | yes | non-BL | DLBCL    | GCB     | negative          | negative | negative | negative | n.a. | n.a. | n.a. | n.a. | n.a. | n.a. | n.a. | no |
| 4175941 | 80 | f | 0,89 | no  | NA     | DLBCL    | n.a.    | non-IG-MYC<br>pos | positive | negative | positive | 4    | 4    | 0    | 4    | 4    | 0    | 90%  | no |
| 4176584 | 65 | m | 0,65 | no  | NA     | DLBCL    | n.a.    | negative          | negative | positive | negative | 4    | 4    | n.a. | 1    | 4    | 3    | 90%  | no |

|          |    |   |      |     |        |          |         |                   |          |          |          |   |   |      |   |      |      |      |    |
|----------|----|---|------|-----|--------|----------|---------|-------------------|----------|----------|----------|---|---|------|---|------|------|------|----|
| 4176046  | 61 | m | 0,87 | yes | non-BL | DLBCL    | GCB     | non-IG-MYC<br>pos | negative | negative | negative | 4 | 4 | n.a. | 4 | 3    | 1    | 70%  | no |
| 4161288  | 73 | m | 0,69 | yes | non-BL | B-NOS    | ABC     | negative          | negative | positive | negative | 4 | 0 | n.a. | 4 | 4    | n.a. | 50%  | no |
| 4164330  | 44 | f | 0,76 | yes | non-BL | FL       | GCB     | negative          | positive | negative | positive | 4 | 4 | 0    | 4 | 4    | 0    | 30%  | no |
| 4171586  | 53 | m | 0,32 | yes | non-BL | DLBCL    | GCB     | negative          | negative | negative | negative | 4 | 4 | 0    | 4 | 4    | 0    | 80%  | no |
| 4171908* | 61 | f | 0,31 | yes | non-BL | FL       | Typelll | negative          | positive | negative | positive | 4 | 0 | 0    | 4 | 4    | 0    | 0%   | no |
| 4177842  | 75 | f | 0,54 | yes | non-BL | DLBCL    | GCB     | negative          | positive | negative | positive | 4 | 4 | n.a. | 4 | 4    | 3    | 50%  | no |
| 4167925  | 71 | f | 0,36 | yes | non-BL | DLBCL    | GCB     | negative          | positive | negative | positive | 4 | 4 | 0    | 4 | 4    | 0    | 90%  | no |
| 4182605  | 75 | f | 0,95 | yes | BL     | DH-BL    | Typelll | non-IG-MYC<br>pos | negative | positive | positive | 4 | 0 | n.a. | 2 | 4    | 3    | 100% | no |
| 4186613  | 45 | m | 0,3  | yes | non-BL | FL-DLBCL | GCB     | negative          | negative | positive | positive | 4 | 1 | n.a. | 1 | 4    | 1    | 10%  | no |
| 4190929  | 77 | f | 0,73 | yes | non-BL | FL       | Typelll | negative          | positive | negative | positive | 4 | 4 | n.a. | 2 | n.a. | n.a. | 40%  | no |

\* cases without germline tissue available; f: female; m: male; GEP: gene expression profile; n.a.: not available

## Supplementary Table 1B, Clinico-biological characteristics

|                                     |             | Diagnosis |          |       |                                              | Total |
|-------------------------------------|-------------|-----------|----------|-------|----------------------------------------------|-------|
|                                     |             | FL        | FL/DLBCL | DLBCL | others<br>(1 B-NOS, 1 intermediate DLBCL/BL) |       |
| Total cases (n=)                    |             | 86        | 17       | 76    | 2                                            | 181   |
| Cases thereof with RNA-seq GEP (n=) |             | 85        | 17       | 72    | 2                                            | 176   |
| GEP classification                  | MYC status* |           |          |       |                                              |       |
| non-mBL                             | single hit  | 84        | 15       | 59    | 1 (B-NOS)                                    | 159   |
|                                     | double hit  | 1         | 2        | 9     | 0                                            | 12    |
| mIntermediate                       | single hit  | 0         | 0        | 0     | 0                                            | 0     |
|                                     | double hit  | 0         | 0        | 3     | 0                                            | 3     |
| mBL                                 | single hit  | 0         | 0        | 0     | 0                                            | 0     |
|                                     | double hit  | 0         | 0        | 1     | 1 (intermediate DLBCL/BL)                    | 2     |

\* single hit: cases exhibiting either a MYC rearrangement or a BCL2 or BCL6 translocation

\* double hit: cases exhibiting both a MYC rearrangement and a BCL2 or BCL6 translocation

Supplementary Table 2. Cohorts and analyses

|                                                                               | Study cohort of 181 nonBL Samples | BL cohort (Lopez et al., Nat Commun) plus one adult BL |
|-------------------------------------------------------------------------------|-----------------------------------|--------------------------------------------------------|
| Datasets                                                                      |                                   |                                                        |
| whole-genome sequencing (matched tumor and normal tissue)                     | 179                               | 40                                                     |
| whole-genome sequencing tumor only                                            | 2                                 | -                                                      |
| RNA-sequencing                                                                | 176                               | not studied herein                                     |
| Analyses                                                                      |                                   |                                                        |
| Structural Variants                                                           | x                                 | -                                                      |
| Detection of genomic structural rearrangements                                | x                                 | -                                                      |
| Detection of copy number aberrations and allelic imbalances                   | x                                 | -                                                      |
| Cancer cell fractions                                                         | x                                 | -                                                      |
| Identification of hallmarks events                                            | x                                 | -                                                      |
| Gene expression based gcBCL classification                                    | x                                 | -                                                      |
| Extraction of clusters of SNVs at high and intermediate mutation density      | x                                 | x                                                      |
| Determination of IG switch regions                                            | x                                 | x                                                      |
| Classification of hypermutation clusters into SHM-like and CSR-like           | x                                 | x                                                      |
| Hypermutation by proxy                                                        | x                                 | x                                                      |
| Unsupervised analysis of mutational signatures                                | x                                 | x                                                      |
| Supervised analysis of mutational signatures                                  | x                                 | x                                                      |
| Synthetic SHM signature                                                       | x                                 | x                                                      |
| Stratified analyses of mutational signatures                                  | x                                 | x                                                      |
| Detection of oncdrivers                                                       | x                                 | -                                                      |
| AID enrichment and signature analysis of driver and recurrently mutated genes | x                                 | -                                                      |

## Supplementary Table 3, Variant statistics per subgroup

### A Summary mutation statistics

|              | <b>coding</b> | <b>noncoding</b> | <b>coding / noncoding (%)</b> | <b>snv fraction (%)</b> | <b>snv fraction coding (%)</b> |
|--------------|---------------|------------------|-------------------------------|-------------------------|--------------------------------|
| DLBCL        | 149           | 17397            | 0,9                           | 93,8                    | 94,7                           |
| FL           | 70            | 7738             | 0,9                           | 93,5                    | 94,2                           |
| FL-DLBCL     | 150           | 15658            | 1                             | 93,2                    | 93,7                           |
| DH-mBL/B-NOS | 110           | 10189            | 1,1                           | 93                      | 92,3                           |
| whole cohort | 110           | 12481            | 0,9                           | 93,6                    | 94,3                           |

#### Explanations:

|                     |                                                   |
|---------------------|---------------------------------------------------|
| coding / noncoding  | ratio coding over noncoding mutations (%)         |
| snv fraction        | fraction of SNVs in all small variants (%)        |
| snv fraction coding | fraction of SNVs in all coding small variants (%) |

### B Variant statistics per subgroup

| subgroup          | BL_leukemia      | BL_solid           | BL_pleura        | DH-BL             | DLBCL             | FL-DLBCL          | FL               | B-NOS       |
|-------------------|------------------|--------------------|------------------|-------------------|-------------------|-------------------|------------------|-------------|
| number_of_SNVs    | 1753 +/- 426.989 | 2359.5 +/- 919.953 | 2696 +/- 699.787 | 9237.5 +/- 5312.9 | 12169 +/- 6948.95 | 12356 +/- 6092    | 5515 +/- 2475.94 | 10277 +/- 0 |
| num_Ka_ROIs       | 3 +/- 1.4826     | 4 +/- 1.4826       | 2 +/- 1.4826     | 20.5 +/- 9.6369   | 12 +/- 7.413      | 9.5 +/- 3.7065    | 6 +/- 2.9652     | 7 +/- 0     |
| num_KaIG_ROIs     | 2 +/- 1.4826     | 3 +/- 1.4826       | 1 +/- 1.4826     | 10.5 +/- 2.2239   | 6 +/- 2.9652      | 6 +/- 1.4826      | 4 +/- 1.4826     | 6 +/- 0     |
| SNVs_Ka           | 42 +/- 22.239    | 61.5 +/- 48.1845   | 31 +/- 7.413     | 632 +/- 339.515   | 391 +/- 330.62    | 418.5 +/- 320.983 | 196 +/- 121.573  | 183 +/- 0   |
| SNVs_Ka_ROIs      | 32 +/- 19.2738   | 54.5 +/- 48.9258   | 31 +/- 0         | 425 +/- 32.6172   | 329 +/- 271.316   | 282 +/- 220.166   | 178 +/- 87.4734  | 156 +/- 0   |
| SNVs_KaIG_ROIs    | 22 +/- 4.4478    | 49 +/- 40.7715     | 20 +/- 7.413     | 283 +/- 42.9954   | 246 +/- 163.086   | 212 +/- 160.121   | 138 +/- 57.8214  | 147 +/- 0   |
| num_KaNonIG_ROIs  | 1 +/- 0          | 1 +/- 1.4826       | 1 +/- 0          | 10 +/- 7.413      | 6 +/- 5.9304      | 4 +/- 2.9652      | 2 +/- 1.4826     | 1 +/- 0     |
| SNVs_KaNonIG_ROIs | 10 +/- 7.413     | 7 +/- 10.3782      | 6 +/- 7.413      | 142 +/- 75.6126   | 78 +/- 90.4386    | 72.5 +/- 71.9061  | 30 +/- 37.065    | 9 +/- 0     |
| SNVs_Ka_nonROIs   | 6 +/- 5.9304     | 5 +/- 7.413        | 5 +/- 1.4826     | 207 +/- 306.898   | 44 +/- 48.9258    | 90 +/- 81.543     | 16 +/- 16.3086   | 27 +/- 0    |
| SNVs_Mech_other   | 7 +/- 2.9652     | 10.5 +/- 8.8956    | 6 +/- 7.413      | 169 +/- 151.225   | 73 +/- 72.6474    | 84.5 +/- 72.6474  | 27 +/- 28.1694   | 51 +/- 0    |

|                         |                          |                         |                          |                          |                         |                         |                         |                 |
|-------------------------|--------------------------|-------------------------|--------------------------|--------------------------|-------------------------|-------------------------|-------------------------|-----------------|
| SNVs_Mech_CSR           | 13 +/- 8.8956            | 12 +/- 14.826           | 9 +/- 5.9304             | 120 +/- 96.369           | 23 +/- 26.6868          | 16.5 +/- 24.4629        | 6 +/- 8.8956            | 18 +/- 0        |
| SNVs_Mech_SHM           | 19 +/- 7.413             | 26 +/- 25.9455          | 12 +/- 14.826            | 343 +/- 284.659          | 263 +/- 243.146         | 302.5 +/- 253.525       | 151 +/- 85.9908         | 114 +/- 0       |
| num_Psi_ROIs            | 2 +/- 1.4826             | 14 +/- 14.826           | 13 +/- 13.3434           | 69.5 +/- 0.7413          | 65 +/- 29.652           | 66 +/- 15.5673          | 63 +/- 38.5476          | 91 +/- 0        |
| SNVs_Psi                | 21 +/- 20.7564           | 133.5 +/- 160.862       | 100 +/- 81.543           | 2006.5 +/- 1277.26       | 2585 +/- 747.23         | 2536.5 +/- 487.775      | 1514 +/- 1363.99        | 2553 +/- 0      |
| SNVs_Psi_ROIs           | 21 +/- 20.7564           | 130 +/- 157.156         | 100 +/- 81.543           | 1974 +/- 1289.86         | 2551 +/- 763.539        | 2510 +/- 523.358        | 1489 +/- 1335.82        | 2530 +/- 0      |
| SNVs_Mech_other_ratio   | 0.147819                 | 0.206019 +/- 0.206633   | 0.305556 +/- 0.453017    | 0.240502 +/- 0.110081    | 0.20339 +/- 0.177996    | 0.176633 +/- 0.11464    | 0.117391 +/- 0.107567   | 0.278689 +/- 0  |
| SNVs_Mech_CSR_ratio     | 0.309524 +/- 0.0947526   | 0.193103 +/- 0.263815   | 0.290323 +/- 0.104951    | 0.261468 +/- 0.292945    | 0.0454545 +/- 0.0646053 | 0.051968 +/- 0.0661141  | 0.0234742 +/- 0.0348028 | 0.0983607 +/- 0 |
| SNVs_Mech_SHM_ratio     | 0.545455 +/- 0.0509176   | 0.491935 +/- 0.161097   | 0.333333 +/- 0.4942      | 0.49803 +/- 0.182864     | 0.673077 +/- 0.196822   | 0.749674 +/- 0.152362   | 0.821739 +/- 0.118024   | 0.622951 +/- 0  |
| SNVs_Ka_ratio           | 0.0225352 +/- 0.00879189 | 0.023942 +/- 0.0156479  | 0.0089803 +/- 0.00648313 | 0.0692162 +/- 0.00305529 | 0.0316448 +/- 0.0148308 | 0.0317343 +/- 0.0178082 | 0.0369257 +/- 0.0163741 | 0.0178068 +/- 0 |
| SNVs_KaROI_ratio        | 0.0225352 +/- 0.0101656  | 0.023942 +/- 0.014642   | 0.0089803 +/- 0.00373351 | 0.0530708 +/- 0.0269924  | 0.0269238 +/- 0.0120625 | 0.025866 +/- 0.0203371  | 0.032 +/- 0.0144141     | 0.0151795 +/- 0 |
| SNVs_KaRecurr_ratio     | 0.918919 +/- 0.120211    | 0.963008 +/- 0.0548441  | 0.861111 +/- 0.205917    | 0.759582 +/- 0.356444    | 0.872449 +/- 0.108448   | 0.845434 +/- 0.0839829  | 0.901515 +/- 0.0833686  | 0.852459 +/- 0  |
| SNVs_KaROI_IG_ratio     | 0.703704 +/- 0.051532    | 0.926662 +/- 0.108732   | NA +/- NA                | 0.671213 +/- 0.152679    | 0.749226 +/- 0.21613    | 0.783019 +/- 0.14159    | 0.842932 +/- 0.152316   | 0.942308 +/- 0  |
| ROIs_Ka_ratio           | 0.75 +/- 0.12355         | 0.816667 +/- 0.27181    | NA +/- NA                | 0.543651 +/- 0.147083    | 0.5 +/- 0.2471          | 0.569444 +/- 0.214742   | 0.714286 +/- 0.1765     | 0.857143 +/- 0  |
| SNVs_Psi_ratio          | 0.0113698 +/- 0.00954826 | 0.0548465 +/- 0.0530083 | 0.037092 +/- 0.0249939   | 0.213103 +/- 0.0157037   | 0.222833 +/- 0.100484   | 0.199039 +/- 0.082989   | 0.215413 +/- 0.135348   | 0.248419 +/- 0  |
| SNVs_PsiROI_ratio       | 0.00954826 +/- 1.75 +/-  | 0.0530083               | 0.037092 +/- 0.0249939   | 0.208542 +/- 0.0196916   | 0.220361 +/- 0.100424   | 0.198478 +/- 0.0817735  | 0.215413 +/- 0.123929   | 0.246181 +/- 0  |
| SNVs_Ka_Psi_ratio       | 2.01798                  | 0.518838 +/- 0.485591   | 0.133333 +/- 0.0844766   | 0.326087 +/- 0.0383666   | 0.166579 +/- 0.110377   | 0.156423 +/- 0.109835   | 0.165146 +/- 0.099458   | 0.0716804 +/- 0 |
| SNVs_KaROI_PsiROI_ratio | 1.6875 +/- 2.17958       | 0.41882 +/- 0.394288    | 0.0763547 +/- 0.113203   | 0.261105 +/- 0.154089    | 0.137012 +/- 0.0841773  | 0.105967 +/- 0.090327   | 0.148776 +/- 0.102962   | 0.0616601 +/- 0 |
| num_KaROI_PsiROI_ratio  | 0.0769231 +/- 0          | 1 +/- 1.15313           | 0.0810811 +/- 0.107881   | 0.294306 +/- 0.135521    | 0.173333 +/- 0.144666   | 0.168775 +/- 0.11367    | 0.112903 +/- 0.0739632  | 0.0769231 +/- 0 |

Explanations:

|                |                                                                                                           |
|----------------|-----------------------------------------------------------------------------------------------------------|
| number_of_SNVs | median number of SNVs per subgroup with MAD (median absolute deviation)                                   |
| num_Ka_ROIs    | median number of kataegis regions affected per subgroup with MAD                                          |
| num_KaIG_ROIs  | median number of kataegis regions inside the IG loci affected per subgroup with MAD                       |
| SNVs_Ka        | median number of SNVs in kataegis clusters per subgroup with MAD                                          |
| SNVs_Ka_ROIs   | median number of SNVs in kataegis regions (and thus in RECURRENT kataegis clusters) per subgroup with MAD |

|                         |                                                                                                                                                                                                                      |
|-------------------------|----------------------------------------------------------------------------------------------------------------------------------------------------------------------------------------------------------------------|
| SNVs_KaIG_ROIs          | median number of SNVs in kataegis regions (and thus in RECURRENT kataegis clusters) inside the IG loci per subgroup with MAD                                                                                         |
| num_KaNonIG_ROIs        | median number of kataegis regions outside the IG loci affected per subgroup with MAD                                                                                                                                 |
| SNVs_KaNonIG_ROIs       | median number of SNVs in kataegis regions (and thus in RECURRENT kataegis clusters) outside the IG loci per subgroup with MAD                                                                                        |
| SNVs_Ka_nonROIs         | median number of SNVs in NON-RECURRENT kataegis clusters per subgroup with MAD                                                                                                                                       |
| SNVs_Mech_other         | median number of SNVs in kataegis clusters of type "other" per subgroup with MAD                                                                                                                                     |
| SNVs_Mech_CSR           | median number of SNVs in CSR-like kataegis clusters per subgroup with MAD                                                                                                                                            |
| SNVs_Mech_SHM           | median number of SNVs in SHM-like kataegis clusters per subgroup with MAD                                                                                                                                            |
| num_Psi_ROIs            | median number of psichales regions affected per subgroup with MAD                                                                                                                                                    |
| SNVs_Psi                | median number of SNVs in psichales clusters per subgroup with MAD                                                                                                                                                    |
| SNVs_Psi_ROIs           | median number of SNVs in psichales regions (and thus in RECURRENT kataegis clusters) per subgroup with MAD                                                                                                           |
| SNVs_Mech_other_ratio   | median fraction of SNVs in kataegis clusters of type "other" among the number of SNVs in kataegis clusters per subgroup with MAD                                                                                     |
| SNVs_Mech_CSR_ratio     | median fraction of SNVs in CSR-like kataegis clusters among the number of SNVs in kataegis clusters per subgroup with MAD                                                                                            |
| SNVs_Mech_SHM_ratio     | median fraction of SNVs in SHM-like kataegis clusters among the number of SNVs in kataegis clusters per subgroup with MAD                                                                                            |
| SNVs_Ka_ratio           | median fraction of the number of SNVs in kataegis clusters among the total number of SNVs per subgroup with MAD                                                                                                      |
| SNVs_KaROI_ratio        | median fraction of the number of SNVs in kataegis regions (and thus in RECURRENT kataegis clusters) among the total number of SNVs per subgroup with MAD                                                             |
| SNVs_KaRecurr_ratio     | median fraction of the number of SNVs in kataegis regions (and thus in RECURRENT kataegis clusters) among the number of SNVs in all kataegis clusters per subgroup with MAD                                          |
| SNVs_KaROI_IG_ratio     | median fraction of the number of SNVs in kataegis regions inside the IG loci among the number of SNVs in kataegis regions (and thus in RECURRENT kataegis clusters) per subgroup with MAD                            |
| ROIs_Ka_ratio           | median fraction of the number of kataegis regions in the IG loci among all kataegis regions per subgroup with MAD                                                                                                    |
| SNVs_Psi_ratio          | median fraction of the number of SNVs in psichales clusters among the total number of SNVs per subgroup with MAD                                                                                                     |
| SNVs_PsiROI_ratio       | median fraction of the number of SNVs in psichales regions (and thus in RECURRENT psichales clusters) among the total number of SNVs per subgroup with MAD                                                           |
| SNVs_Ka_Psi_ratio       | median ratio of the number of SNVs in kataegis clusters divided by the number of SNVs in psichales clusters per subgroup with MAD                                                                                    |
| SNVs_KaROI_PsiROI_ratio | median ratio of the number of SNVs in kataegis regions (and thus in RECURRENT kataegis clusters) divided by the number of SNVs in psichales regions (and thus in RECURRENT psichales clusters) per subgroup with MAD |
| num_KaROI_PsiROI_ratio  | median ratio of the number of kataegis regions divided by the number of psichales regions per subgroup with MAD                                                                                                      |

## C Variant statistics per subgroup for DLBCL

| ABCGCB                | ABC                     | GCB                     | Typelll                 | n.d.                     |   |
|-----------------------|-------------------------|-------------------------|-------------------------|--------------------------|---|
| number of cases       |                         | 23                      | 37                      | 11                       | 4 |
| number_of_SNVs        | 8978 +/- 6986.01        | 12477.5 +/- 7338.13     | 12909.5 +/- 5729.51     | 16800.5 +/- 1968.15      |   |
| num_Ka_ROIs           | 8 +/- 5.9304            | 13.5 +/- 9.6369         | 11 +/- 7.413            | 16 +/- 8.8956            |   |
| num_KaIG_ROIs         | 5 +/- 2.9652            | 6 +/- 2.9652            | 7 +/- 2.9652            | 8.5 +/- 3.7065           |   |
| SNVs_Ka               | 270 +/- 206.081         | 470 +/- 358.789         | 494 +/- 345.446         | 637.5 +/- 9.6369         |   |
| SNVs_Ka_ROIs          | 249 +/- 174.947         | 358 +/- 225.355         | 426.5 +/- 354.341       | 507 +/- 17.7912          |   |
| SNVs_KaIG_ROIs        | 222 +/- 177.912         | 254.5 +/- 123.797       | 357.5 +/- 259.455       | 326.5 +/- 74.8713        |   |
| num_KaNonIG_ROIs      | 3 +/- 4.4478            | 7.5 +/- 8.1543          | 5.5 +/- 5.9304          | 7.5 +/- 5.1891           |   |
| SNVs_KaNonIG_ROIs     | 38 +/- 56.3388          | 91 +/- 83.0256          | 85.5 +/- 100.817        | 180.5 +/- 92.6625        |   |
| SNVs_Ka_nonROIs       | 26 +/- 20.7564          | 64 +/- 72.6474          | 49 +/- 49.6671          | 130.5 +/- 27.4281        |   |
| SNVs_Mech_other       | 43 +/- 48.9258          | 90.5 +/- 81.543         | 117.5 +/- 77.8365       | 94 +/- 31.1346           |   |
| SNVs_Mech_CSR         | 28 +/- 29.652           | 20 +/- 22.239           | 29.5 +/- 37.8063        | 55 +/- 5.9304            |   |
| SNVs_Mech_SHM         | 188 +/- 131.951         | 324 +/- 273.54          | 274.5 +/- 317.276       | 488.5 +/- 46.7019        |   |
| num_Psi_ROIs          | 62 +/- 37.065           | 65.5 +/- 30.3933        | 73 +/- 26.6868          | 59 +/- 8.8956            |   |
| SNVs_Psi              | 2571 +/- 1264.66        | 2522.5 +/- 607.125      | 2598.5 +/- 651.603      | 4313.5 +/- 779.106       |   |
| SNVs_Psi_ROIs         | 2521 +/- 1338.79        | 2522.5 +/- 597.488      | 2589 +/- 665.687        | 4313.5 +/- 779.106       |   |
| SNVs_Mech_other_ratio | 0.128205 +/- 0.0769014  | 0.238813 +/- 0.201166   | 0.27579 +/- 0.179998    | 0.147802 +/- 0.0510729   |   |
| SNVs_Mech_CSR_ratio   | 0.0680851 +/- 0.0692635 | 0.0325237 +/- 0.0482196 | 0.0392718 +/- 0.0526422 | 0.0863475 +/- 0.0106079  |   |
| SNVs_Mech_SHM_ratio   | 0.717391 +/- 0.213821   | 0.65629 +/- 0.206666    | 0.718736 +/- 0.183282   | 0.76585 +/- 0.0616807    |   |
| SNVs_Ka_ratio         | 0.0301586 +/- 0.0115146 | 0.0306745 +/- 0.0181282 | 0.0331236 +/- 0.0173698 | 0.0381529 +/- 0.00389595 |   |
| SNVs_KaROI_ratio      | 0.027093 +/- 0.0109481  | 0.0237205 +/- 0.0132039 | 0.0312556 +/- 0.0186984 | 0.0304241 +/- 0.0046231  |   |
| SNVs_KaRecurr_ratio   | 0.894799 +/- 0.0753113  | 0.846 +/- 0.132064      | 0.88834 +/- 0.0843561   | 0.795569 +/- 0.0399341   |   |
| SNVs_KaROI_IG_ratio   | 0.878187 +/- 0.1806     | 0.700707 +/- 0.183481   | 0.810383 +/- 0.227881   | 0.646704 +/- 0.170369    |   |
| ROIs_Ka_ratio         | 0.625 +/- 0.344175      | 0.459936 +/- 0.19768    | 0.535714 +/- 0.231955   | 0.55 +/- 0.07413         |   |
| SNVs_Psi_ratio        | 0.193268 +/- 0.112735   | 0.224571 +/- 0.105024   | 0.19919 +/- 0.0825156   | 0.255874 +/- 0.0163987   |   |
| SNVs_PsiROI_ratio     | 0.193268 +/- 0.112735   | 0.221356 +/- 0.10207    | 0.198663 +/- 0.0796763  | 0.255874 +/- 0.0163987   |   |
| SNVs_Ka_Psi_ratio     | 0.12483 +/- 0.0875607   | 0.17124 +/- 0.120341    | 0.19497 +/- 0.153448    | 0.149832 +/- 0.0248286   |   |

|                         |                        |                       |                       |                        |
|-------------------------|------------------------|-----------------------|-----------------------|------------------------|
| SNVs_KaROI_PsiROI_ratio | 0.120068 +/- 0.04899   | 0.13895 +/- 0.0964113 | 0.174511 +/- 0.156131 | 0.119653 +/- 0.0257363 |
| num_KaROI_PsiROI_ratio  | 0.150442 +/- 0.0828001 | 0.220362 +/- 0.198217 | 0.27159 +/- 0.259626  | 0.28447 +/- 0.193663   |

---

Explanations:

|                       |                                                                                                                                                                                           |
|-----------------------|-------------------------------------------------------------------------------------------------------------------------------------------------------------------------------------------|
| number_of_SNVs        | median number of SNVs per subgroup with MAD (median absolute deviation)                                                                                                                   |
| num_Ka_ROIs           | median number of kataegis regions affected per subgroup with MAD                                                                                                                          |
| num_KaIG_ROIs         | median number of kataegis regions inside the IG loci affected per subgroup with MAD                                                                                                       |
| SNVs_Ka               | median number of SNVs in kataegis clusters per subgroup with MAD                                                                                                                          |
| SNVs_Ka_ROIs          | median number of SNVs in kataegis regions (and thus in RECURRENT kataegis clusters) per subgroup with MAD                                                                                 |
| SNVs_KaIG_ROIs        | median number of SNVs in kataegis regions (and thus in RECURRENT kataegis clusters) inside the IG loci per subgroup with MAD                                                              |
| num_KaNonIG_ROIs      | median number of kataegis regions outside the IG loci affected per subgroup with MAD                                                                                                      |
| SNVs_KaNonIG_ROIs     | median number of SNVs in kataegis regions (and thus in RECURRENT kataegis clusters) outside the IG loci per subgroup with MAD                                                             |
| SNVs_Ka_nonROIs       | median number of SNVs in NON-RECURRENT kataegis clusters per subgroup with MAD                                                                                                            |
| SNVs_Mech_other       | median number of SNVs in kataegis clusters of type "other" per subgroup with MAD                                                                                                          |
| SNVs_Mech_CSR         | median number of SNVs in CSR-like kataegis clusters per subgroup with MAD                                                                                                                 |
| SNVs_Mech_SHM         | median number of SNVs in SHM-like kataegis clusters per subgroup with MAD                                                                                                                 |
| num_Psi_ROIs          | median number of psichales regions affected per subgroup with MAD                                                                                                                         |
| SNVs_Psi              | median number of SNVs in psichales clusters per subgroup with MAD                                                                                                                         |
| SNVs_Psi_ROIs         | median number of SNVs in psichales regions (and thus in RECURRENT kataegis clusters) per subgroup with MAD                                                                                |
| SNVs_Mech_other_ratio | median fraction of SNVs in kataegis clusters of type "other" among the number of SNVs in kataegis clusters per subgroup with MAD                                                          |
| SNVs_Mech_CSR_ratio   | median fraction of SNVs in CSR-like kataegis clusters among the number of SNVs in kataegis clusters per subgroup with MAD                                                                 |
| SNVs_Mech_SHM_ratio   | median fraction of SNVs in SHM-like kataegis clusters among the number of SNVs in kataegis clusters per subgroup with MAD                                                                 |
| SNVs_Ka_ratio         | median fraction of the number of SNVs in kataegis clusters among the total number of SNVs per subgroup with MAD                                                                           |
| SNVs_KaROI_ratio      | median fraction of the number of SNVs in kataegis regions (and thus in RECURRENT kataegis clusters) among the total number of SNVs per subgroup with MAD                                  |
| SNVs_KaRecurr_ratio   | median fraction of the number of SNVs in kataegis regions (and thus in RECURRENT kataegis clusters) among the number of SNVs in all kataegis clusters per subgroup with MAD               |
| SNVs_KaROI_IG_ratio   | median fraction of the number of SNVs in kataegis regions inside the IG loci among the number of SNVs in kataegis regions (and thus in RECURRENT kataegis clusters) per subgroup with MAD |
| ROIs_Ka_ratio         | median fraction of the number of kataegis regions in the IG loci among all kataegis regions per subgroup with MAD                                                                         |
| SNVs_Psi_ratio        | median fraction of the number of SNVs in psichales clusters among the total number of SNVs per subgroup with MAD                                                                          |

|                         |                                                                                                                                                                                                                      |
|-------------------------|----------------------------------------------------------------------------------------------------------------------------------------------------------------------------------------------------------------------|
| SNVs_PsiROI_ratio       | median fraction of the number of SNVs in psichales regions (and thus in RECURRENT psichales clusters) among the total number of SNVs per subgroup with MAD                                                           |
| SNVs_Ka_Psi_ratio       | median ratio of the number of SNVs in kataegis clusters divided by the number of SNVs in psichales clusters per subgroup with MAD                                                                                    |
| SNVs_KaROI_PsiROI_ratio | median ratio of the number of SNVs in kataegis regions (and thus in RECURRENT kataegis clusters) divided by the number of SNVs in psichales regions (and thus in RECURRENT psichales clusters) per subgroup with MAD |
| num_KaROI_PsiROI_ratio  | median ratio of the number of kataegis regions divided by the number of psichales regions per subgroup with MAD                                                                                                      |

## Supplemental Table 4. Clusters of mutation density

Suppl. Table 4A: p-values and effect strength of the Wilcoxon rank sum tests of replication time averaged over cell lines vs. psichales in the different entities. Abbreviations: p-val.: p-value; corr. p-val.: corrected p-value; diff.: difference in Repli-seq scores between psichales clusters and background; conf. int.: confidence interval for the difference. Note that both the difference values and the confidence intervals are in units of RepliSeq scores. These results are based on distributions shown in Extended Data Figure 4A.

| Entity       | BRCA-EU                 | BRCA-UK                 | BRCA-US                 | CLLE-ES                 | DLBC-US                 | OV-AU                   | OV-US                   | SARC-US                 |
|--------------|-------------------------|-------------------------|-------------------------|-------------------------|-------------------------|-------------------------|-------------------------|-------------------------|
| p-val.       | < 2.2×10 <sup>-16</sup> | < 2.2×10 <sup>-16</sup> | < 2.2×10 <sup>-16</sup> | < 2.2×10 <sup>-16</sup> | < 2.2×10 <sup>-16</sup> | < 2.2×10 <sup>-16</sup> | < 2.2×10 <sup>-16</sup> | < 2.2×10 <sup>-16</sup> |
| corr. p-val. | < 2.2×10 <sup>-16</sup> | < 2.2×10 <sup>-16</sup> | < 2.2×10 <sup>-16</sup> | < 2.2×10 <sup>-16</sup> | < 2.2×10 <sup>-16</sup> | < 2.2×10 <sup>-16</sup> | < 2.2×10 <sup>-16</sup> | < 2.2×10 <sup>-16</sup> |
| diff.        | 3,76                    | 1,14                    | 5,24                    | 2,59                    | 21                      | 8,75                    | 9,75                    | 8,72                    |
| conf. int.   | [3.62 - 3.90]           | [1.02 - 1.27]           | [5.14 - 5.33]           | [2.45 - 2.73]           | [20.79 - 21.22]         | [8.65 - 8.85]           | [9.61 - 9.89]           | [8.50 - 8.94]           |

Suppl. Table 4B: Comparison of p-values and effect strength of the Wilcoxon rank sum tests in the breast cancer cell line MCF7 against replication time averaged over cell lines vs. psichales in the breast cancer entities. Abbreviations as in Extended Data Table 4A. Also in analogy to Extended Data Table 4A, both the difference values and the confidence intervals are in units of RepliSeq scores. These results are based on distributions shown in Extended Data Figure 4C.

| Cell line | MCF7                    |       |               | average over cell lines |       |               |
|-----------|-------------------------|-------|---------------|-------------------------|-------|---------------|
|           | p-val.                  | diff. | conf. int     | p-val.                  | diff. | conf. int     |
| BRCA-EU   | < 2.2×10 <sup>-16</sup> | 4,09  | [3.94 - 4.24] | < 2.2×10 <sup>-16</sup> | 3,76  | [3.62 - 3.90] |
| BRCA-UK   | < 2.2×10 <sup>-16</sup> | 1,16  | [1.02 - 1.29] | < 2.2×10 <sup>-16</sup> | 1,14  | [1.02 - 1.27] |
| BRCA-US   | < 2.2×10 <sup>-16</sup> | 5,75  | [5.65 - 5.85] | < 2.2×10 <sup>-16</sup> | 5,24  | [5.14 - 5.33] |

Suppl. Table 4C: Comparison of p-values and effect strength of the Wilcoxon rank sum tests in the lymphoblastoid cell lines GM06990 and GM12878 against replication time averaged over cell lines vs. psichales in the B-cell derived entities. Abbreviations as in Extended Data Tables 4A and 4B. Also in analogy to Extended Data Tables 4A and 4B, both the difference values and the confidence intervals are in units of RepliSeq scores. These results are based on distributions shown in Extended Data Figure 4D.

| Cell line | GM06990                 |       |                 | GM12878                 |       |                 | average over cell lines |       |                 |
|-----------|-------------------------|-------|-----------------|-------------------------|-------|-----------------|-------------------------|-------|-----------------|
|           | p-val.                  | diff. | conf. int       | p-val.                  | diff. | conf. int       | p-val.                  | diff. | conf. int       |
| CLLE-ES   | < 2.2×10 <sup>-16</sup> | 2,88  | [2.73 - 3.03]   | < 2.2×10 <sup>-16</sup> | 3,54  | [3.36 - 3.73]   | < 2.2×10 <sup>-16</sup> | 2,59  | [2.45 - 2.73]   |
| DLBC-US   | < 2.2×10 <sup>-16</sup> | 24,23 | [23.98 - 24.49] | < 2.2×10 <sup>-16</sup> | 27,77 | [27.50 - 28.04] | < 2.2×10 <sup>-16</sup> | 21    | [20.79 - 21.22] |

## Supplemental Table 5. Cataegis analysis

### a) Decomp\_cluaster\_vs\_distTSScat

| Distance to closest TSS | close | intermediate | far |     |
|-------------------------|-------|--------------|-----|-----|
| other                   |       | 682          | 486 | 616 |
| CSR_like                |       | 347          | 70  | 10  |
| SHM_like                |       | 1547         | 345 | 429 |

Explanations for the categories of distances to the closest transcription start site (TSS) (analogous to the definitions in Extended Data Figure 9F):

|              |                          |
|--------------|--------------------------|
| close        | less than 2.5 kb         |
| intermediate | between 2.5 kb and 20 kb |
| far          | more than 20 kb          |

### b) decomp\_cluster\_vs\_maxState

|          | Enhancer | Heterochromatin | PoisedPromoter | Promoter | Transcription |
|----------|----------|-----------------|----------------|----------|---------------|
| other    | 198      | 914             | 40             | 481      | 151           |
| CSR_like | 67       | 13              | 9              | 317      | 21            |
| SHM_like | 246      | 625             | 118            | 1236     | 96            |

### c) dist\_TSS\_cat\_vs\_maxState

|              | Enhancer | Heterochromatin | PoisedPromoter | Promoter | Transcription |
|--------------|----------|-----------------|----------------|----------|---------------|
| close        | 292      | 186             | 166            | 1816     | 116           |
| intermediate | 172      | 408             | 1              | 199      | 121           |
| far          | 47       | 958             | 0              | 19       | 31            |

Explanations for the categories of distances to the closest transcription start site (TSS) (analogous to the definitions in Extended Data Figure 9F):

|              |                          |
|--------------|--------------------------|
| close        | less than 2.5 kb         |
| intermediate | between 2.5 kb and 20 kb |
| far          | more than 20 kb          |

### d) dist\_TSS\_vs\_decomp\_cluster

Statistical measures of the distribution of distances to the closest transcription start site (TSS)

|          | median | mad         |
|----------|--------|-------------|
| other    | 7417.5 | 105.909.531 |
| CSR_like | 559.5  | 4.937.058   |
| SHM_like | 726.5  | 8.280.321   |

### e) decomp\_cluster\_vs\_recurrency

|          | non-recurrent kataegis clusters | recurrent kataegis clusters |
|----------|---------------------------------|-----------------------------|
| other    | 1191                            | 593                         |
| CSR_like | 48                              | 379                         |
| SHM_like | 836                             | 1485                        |

f) dist\_TSS\_cat\_vs\_recurrency

|              | non-recurrent kataegis clusters | recurrent kataegis clusters |
|--------------|---------------------------------|-----------------------------|
| close        | 434                             | 2142                        |
| intermediate | 625                             | 276                         |
| far          | 1016                            | 39                          |

Explanations for the categories of distances to the closest transcription start site (TSS) (analogous to the definitions in Extended Data Figure 12F):

|              |                          |
|--------------|--------------------------|
| close        | less than 2.5 kb         |
| intermediate | between 2.5 kb and 20 kb |
| far          | more than 20 kb          |

g) maxState\_vs\_recurrency

|                 | non-recurrent kataegis clusters | recurrent kataegis clusters |
|-----------------|---------------------------------|-----------------------------|
| Enhancer        | 180                             | 331                         |
| Heterochromatin | 1427                            | 125                         |
| PoisedPromoter  | 11                              | 156                         |
| Promoter        | 245                             | 1789                        |
| Transcription   | 212                             | 56                          |

h) pairWil\_dist\_TSS\_vs\_class

Table of pairwise posthoc tests for the distance to the closest TSS (Wilcoxon rank sum tests)

|          | other    | CSR_like |
|----------|----------|----------|
| CSR_like | 3,29E-46 | NA       |
| SHM_like | 3,93E-50 | 2,81E+08 |

i) pairWil\_dist\_TSS\_vs\_max\_maxState

Table of pairwise posthoc tests for the distance to the closest TSS (Wilcoxon rank sum tests)

|                 | Enhancer  | Heterochromatin | PoisedPromoter | Promoter |
|-----------------|-----------|-----------------|----------------|----------|
| Heterochromatin | 1,71E-105 | NA              | NA             | NA       |
| PoisedPromoter  | 1,55E-07  | 9,48E-71        | NA             | NA       |
| Promoter        | 5,15E-09  | 0               | 2,91E+05       | NA       |
| Transcription   | 1,83E+09  | 3,69E-45        | 1,64E-23       | 9,53E-37 |

j) comb\_SHM\_CSR\_vs\_distTSScar

Fisher test for the combined analysis of SHM-like and CSR-like profiles vs. the categorized distance to the closest TSS

|         |          |
|---------|----------|
| p-value | 3,30E-72 |
|---------|----------|

## Supplementary Table 7, HbP characteristics

Suppl. Table 7A-C: Influence of TSS proximity on subject or object state in HbP relationships. (A) All HbP interactions. (B) Only HbP interactions involving IG loci. (C) Only HbP interactions without IG locus overlap.

|                        |             | Object |     | Row sums |     |
|------------------------|-------------|--------|-----|----------|-----|
|                        |             | close  | far |          |     |
| A) All interactions    | Subject     | close  | 271 | 164      | 435 |
|                        |             | far    | 34  | 27       | 61  |
|                        | Column sums |        | 305 | 191      | 496 |
| B) IG interactions     | Subject     | close  | 181 | 116      | 297 |
|                        |             | far    | 6   | 1        | 7   |
|                        | Column sums |        | 187 | 117      | 304 |
| C) Non-IG interactions | Subject     | close  | 90  | 48       | 138 |
|                        |             | far    | 28  | 26       | 54  |
|                        | Column sums |        | 118 | 74       | 192 |

Suppl. Table 7D: Test statistics (Wilcoxon rank sum test) for differences in the abundance fractions of the different chromatin states between subject and object regions in HbP relationships.

| Grouping                                         | Chromatin state | W statistic | p-value                | BH-corrected p-value   |
|--------------------------------------------------|-----------------|-------------|------------------------|------------------------|
| HbP relationships involving all kataegis regions | Heterochromatin | 110,118     | 4.56×10 <sup>-10</sup> | 1.82×10 <sup>-9</sup>  |
|                                                  | Enhancer        | 146,655     | 5.55×10 <sup>-8</sup>  | 1.66×10 <sup>-7</sup>  |
|                                                  | Transcription   | 144,106.5   | 3.42×10 <sup>-10</sup> | 1.71×10 <sup>-9</sup>  |
|                                                  | Promoter        | 134,478.5   | 9.52×10 <sup>-3</sup>  | 1.90×10 <sup>-2</sup>  |
|                                                  | Poised Promoter | 120,367     | 0.101                  | 0.101                  |
| Only HbP relationships involving the IG loci     | Heterochromatin | 39,088      | 1.11×10 <sup>-10</sup> | 4.43×10 <sup>-10</sup> |
|                                                  | Enhancer        | 55,762      | 6.61×10 <sup>-6</sup>  | 1.32×10 <sup>-5</sup>  |
|                                                  | Transcription   | 59,560.5    | 4.77×10 <sup>-13</sup> | 2.38×10 <sup>-12</sup> |
|                                                  | Promoter        | 56,432.5    | 1.55×10 <sup>-6</sup>  | 4.68×10 <sup>-6</sup>  |
|                                                  | Poised Promoter | 43,320      | 9.71×10 <sup>-6</sup>  | 1.32×10 <sup>-5</sup>  |
| HbP relationships involving only non-IG loci     | Heterochromatin | 17,930      | 0.2                    | 0.39                   |
|                                                  | Enhancer        | 21,216      | 3.69×10 <sup>-3</sup>  | 1.84×10 <sup>-2</sup>  |
|                                                  | Transcription   | 17,476      | 6.81×10 <sup>-3</sup>  | 2.73×10 <sup>-2</sup>  |
|                                                  | Promoter        | 17,410      | 0.31                   | 0.39                   |
|                                                  | Poised Promoter | 19,228      | 0.087                  | 0.26                   |

Supplementary Table 9, Mutational signatures

| Signature | Colour     | Mutational Mechanism                               | Category                   | Comment                          |
|-----------|------------|----------------------------------------------------|----------------------------|----------------------------------|
| AC1       | green      | spontaneous deamination                            | clock-like                 | previously described in lymphoma |
| AC2       | pink       | APOBEC                                             | phys. endo. mut.           | previously described in lymphoma |
| AC3       | gold       | HRR defect                                         | DNA repair defect          |                                  |
| AC6       | red        | MMR defect                                         | DNA repair defect          |                                  |
| AC8       | orange     | possibly HRR defect                                | possibly DNA repair defect |                                  |
| AC9       | brown      | previously POL $\eta$ , implicated in AID activity | phys. endo. mut.           | previously described in lymphoma |
| AC10      | purple     | activity of error-prone POL $\epsilon$             | phys. endo. mut.           |                                  |
| AC12      | blue       | unknown                                            | unknown                    |                                  |
| AC17      | turquoise  | unknown                                            | unknown                    | previously described in lymphoma |
| AC26      | ocre       | MMR defect                                         | DNA repair defect          |                                  |
| AC28      | dark blue  | unknown                                            | unknown                    |                                  |
| L1        | carmen     | CSR                                                | new signature              |                                  |
| L2        | lightbrown | SHM                                                | new signature              |                                  |
| L3        | black      | unknown                                            | new signature              | very similar to AC17             |

Supplemental Table 10. Stratified analysis of mutational signatures. Numbers of SNVs in the different strata with different stratification axes

| Stratification axis                                | Stratum                 | Number of SNVs | Matching Figure    |
|----------------------------------------------------|-------------------------|----------------|--------------------|
| Cellular fractions<br>(corrected allele frequency) | early                   | 1832664        | Suppl. Figure S12D |
|                                                    | late                    | 64067          |                    |
|                                                    | unknown                 | 236610         |                    |
| Replication timing<br>(encoded by RepliSeq scores) | early                   | 297675         | Main Figure 4E     |
|                                                    | intermediate            | 822194         |                    |
|                                                    | late                    | 1011923        |                    |
|                                                    | undetermined            | 1549           |                    |
| Mutation density                                   | high                    | 650387         | Suppl. Figure S12E |
|                                                    | intermediate            | 245894         |                    |
|                                                    | background              | 1237060        |                    |
| Breakpoint proximity                               | Less than 100 kb        | 80477          | Main Figure 4D     |
|                                                    | Between 100 kp and 1 Mb | 171221         |                    |
|                                                    | More than 1 Mb          | 1881643        |                    |
| Subregions in IG loci                              | IG_const_noSwitch       | 1058           | Main Figure 4C     |
|                                                    | IG_const_switch         | 7591           |                    |
|                                                    | IG_VDJ                  | 41267          |                    |
|                                                    | none                    | 2083425        |                    |
| Distance to TSS                                    | close                   | 272755         | Suppl. Figure S12F |
|                                                    | intermediate            | 1169463        |                    |
|                                                    | far                     | 691123         |                    |
| Chromatin state                                    | Enhancer                | 55218          | Main Figure 4D     |
|                                                    | Heterochromatin         | 1837471        |                    |
|                                                    | PoisedPromoter          | 12441          |                    |
|                                                    | Promoter                | 80492          |                    |
|                                                    | Transcription           | 144922         |                    |
| Hypermutation category                             | None                    | 1685331        | Main Figure 4G     |
|                                                    | Psichales               | 374680         |                    |
|                                                    | Kataegis_other          | 17215          |                    |
|                                                    | Kataegis CSR-like       | 5748           |                    |
|                                                    | Kataegis SHM-like       | 50367          |                    |

## Supplementary Table 11, Driver genes identified by IntOGen

The cohort column indicates whether the gene has been identified in the full cohort, or the DLBCL or FL specific analysis.

| GENE      | Full cohort | DLBCL | FL  |
|-----------|-------------|-------|-----|
| ACTB      | yes         | yes   | yes |
| ACTG1     | yes         |       | yes |
| ADAMTS1   |             | yes   |     |
| ANKRD12   |             | yes   |     |
| ARID1A    | yes         |       | yes |
| ATP6AP1   | yes         |       | yes |
| ATP6V1A   | yes         |       |     |
| ATP6V1B2  | yes         |       | yes |
| B2M       | yes         | yes   | yes |
| BCL2      |             |       | yes |
| BCL6      | yes         | yes   |     |
| BCL7A     | yes         |       | yes |
| BRAF      | yes         | yes   |     |
| BTG2      | yes         |       |     |
| CADPS2    | yes         | yes   |     |
| CARD11    | yes         |       |     |
| CCND3     | yes         |       |     |
| CD58      | yes         |       |     |
| CD74      | yes         |       |     |
| CD79A     | yes         |       |     |
| CD79B     | yes         | yes   |     |
| CD83      | yes         | yes   |     |
| CDC42BPB  |             |       | yes |
| CDKN2A    | yes         |       |     |
| CNOT2     | yes         | yes   |     |
| CPNE8     | yes         |       | yes |
| CREBBP    | yes         | yes   | yes |
| CXCR4     |             |       | yes |
| CYLD      | yes         |       |     |
| DHX15     |             |       | yes |
| DHX16     |             | yes   |     |
| DMXL1     | yes         |       |     |
| DNM2      |             | yes   |     |
| EBF1      | yes         |       | yes |
| EEF1A1    | yes         | yes   | yes |
| EP300     | yes         | yes   | yes |
| EZH2      | yes         | yes   | yes |
| FAM136A   | yes         |       |     |
| FAS       | yes         | yes   |     |
| FBXO11    | yes         | yes   |     |
| FBXW7     | yes         |       |     |
| FCGR2B    | yes         |       |     |
| FES       | yes         |       |     |
| FOXO1     | yes         |       | yes |
| FUBP1     | yes         |       |     |
| FZR1      | yes         |       | yes |
| GAK       | yes         | yes   |     |
| GNA11     | yes         |       |     |
| GNA13     | yes         | yes   | yes |
| GNAI2     | yes         | yes   | yes |
| GRB2      | yes         | yes   |     |
| HIST1H2AC | yes         |       |     |
| HIST1H2BD | yes         |       |     |
| HLA-A     | yes         | yes   |     |
| HLA-B     | yes         | yes   |     |
| HLA-DMB   | yes         | yes   |     |
| HLA-DQA1  | yes         | yes   |     |
| ID2       | yes         |       |     |
| IKBKE     | yes         | yes   |     |
| IL4R      | yes         | yes   |     |
| INO80     | yes         |       |     |
| IRF1      | yes         | yes   |     |
| IRF8      |             | yes   | yes |
| JHDM1D    |             | yes   |     |
| JUNB      |             | yes   |     |
| JUP       |             |       | yes |
| LAPTM5    |             | yes   | yes |
| LRP12     |             | yes   |     |
| MEF2C     |             | yes   | yes |
| MGEA5     |             |       | yes |
| KMT2D     |             | yes   | yes |
| MRPL13    |             | yes   |     |
| MYCBP2    |             |       | yes |
| MYD88     |             | yes   |     |
| MYH9      |             | yes   |     |
| NFKBIA    |             | yes   |     |
| NFKBIE    |             | yes   |     |
| NOTCH2    |             | yes   |     |
| NR2F2     |             | yes   |     |
| PDS5B     |             |       | yes |
| PIM1      |             | yes   |     |
| PNPO      |             | yes   |     |
| PPP3CA    |             | yes   |     |
| PPP4C     |             |       | yes |
| PRKDC     |             | yes   | yes |
| PTPN6     |             | yes   |     |
| RAC2      |             | yes   |     |
| RBM6      |             | yes   | yes |
| RRAGC     |             | yes   | yes |
| SGK1      |             | yes   |     |
| SIAH2     |             |       | yes |
| SIN3A     |             | yes   |     |
| SLC34A2   |             | yes   |     |
| SOCS1     |             | yes   | yes |
| SPEN      |             | yes   |     |
| STAT3     |             | yes   |     |
| STAT6     |             | yes   | yes |
| SYNCRIP   |             | yes   |     |
| TAF1      |             | yes   |     |
| TBL1XR1   |             | yes   |     |
| TET2      |             | yes   |     |
| TMEM30A   |             | yes   |     |
| TNFAIP3   |             | yes   |     |
| TNFRSF14  |             | yes   | yes |
| TOX       |             | yes   |     |
| TP53      |             | yes   | yes |
| TPP1      |             | yes   | yes |
| TRAF6     |             | yes   |     |
| UBE2A     |             | yes   |     |
| UGGT2     |             | yes   |     |
| UNC5B     |             | yes   |     |
| VMA21     |             | yes   | yes |
| WAPAL     |             | yes   |     |
| WNK1      |             | yes   |     |
| XPO1      |             | yes   |     |
| ZFP36L1   |             | yes   |     |
| ZNF217    |             | yes   |     |
| ZNF292    |             | yes   |     |

## Supplemental Table 12. NFM consensus clustering

Suppl Table 12A: Pairwise post-hoc tests (Wilcoxon rank sum test p-values) for total mutational load between the different consensus clusters.

|            | TP53-like            | B2M-like             | PIM1-like            | BCL6-like            | PAX5-like            | BCL2-like            | CSMD1-like | SOCS1-like |
|------------|----------------------|----------------------|----------------------|----------------------|----------------------|----------------------|------------|------------|
| B2M-like   | 1                    | -                    | -                    | -                    | -                    | -                    | -          | -          |
| PIM1-like  | 1                    | 1                    | -                    | -                    | -                    | -                    | -          | -          |
| BCL6-like  | 1                    | 1                    | 1                    | -                    | -                    | -                    | -          | -          |
| PAX5-like  | 1                    | 1                    | 1                    | 1                    | -                    | -                    | -          | -          |
| BCL2-like  | 1.7×10 <sup>-5</sup> | 1.7×10 <sup>-5</sup> | 1.7×10 <sup>-5</sup> | 1.7×10 <sup>-5</sup> | 1.7×10 <sup>-5</sup> | -                    | -          | -          |
| CSMD1-like | 1                    | 1                    | 1                    | 1                    | 1                    | 0.99                 | -          | -          |
| SOCS1-like | 1                    | 1                    | 1                    | 1                    | 1                    | 3.2×10 <sup>-3</sup> | 1          | -          |
| MYD88-like | 5.4×10 <sup>-2</sup> | 5.6×10 <sup>-2</sup> | 2.5×10 <sup>-2</sup> | 1                    | 1.9×10 <sup>-2</sup> | 1                    | 1          | 0.86       |

Suppl Table 12B: Pairwise post-hoc tests (Wilcoxon rank sum test p-values) for the fraction of the aberrant genome between the different consensus clusters.

|            | TP53-like             | B2M-like | PIM1-like            | BCL6-like | PAX5-like | BCL2-like             | CSMD1-like | SOCS1-like |
|------------|-----------------------|----------|----------------------|-----------|-----------|-----------------------|------------|------------|
| B2M-like   | 1                     | -        | -                    | -         | -         | -                     | -          | -          |
| PIM1-like  | 1                     | 1        | -                    | -         | -         | -                     | -          | -          |
| BCL6-like  | 1                     | 1        | 0.49                 | -         | -         | -                     | -          | -          |
| PAX5-like  | 1                     | 1        | 0.69                 | 1         | -         | -                     | -          | -          |
| BCL2-like  | 9.84×10 <sup>-2</sup> | 1        | 5.6×10 <sup>-3</sup> | 1         | 1         | -                     | -          | -          |
| CSMD1-like | 1                     | 1        | 1                    | 1         | 1         | 1                     | -          | -          |
| SOCS1-like | 1                     | 1        | 1                    | 0.54      | 0.72      | 1.33×10 <sup>-2</sup> | 1          | -          |
| MYD88-like | 1                     | 1        | 1                    | 1         | 1         | 0.69                  | 1          | 1          |

Suppl. Table 12C: Cross-over of the DLBCL cases between the consensus clustering restricted to DLBCLs (rows) and the consensus clustering of the whole gcBCL cohort (columns). Fields highlighted in green indicate predominant matching of corresponding consensus clusters (on the diagonal), whereas fields highlighted in orange indicate predominant matching of off-diagonal fields (high level of cross-over).

|            | BCL2-like | BCL6-like | MYD88-like | TP53-like | B2M-like | SOCS1-like | CSMD1-like | PIM1-like | PAX5-like |
|------------|-----------|-----------|------------|-----------|----------|------------|------------|-----------|-----------|
| BCL2-like  | 1         | 0         | 0          | 1         | 3        | 1          | 4          | 0         | 0         |
| BCL6-like  | 0         | 3         | 1          | 2         | 0        | 1          | 2          | 5         | 2         |
| MYD88-like | 0         | 8         | 10         | 1         | 0        | 2          | 0          | 3         | 2         |
| TP53-like  | 0         | 4         | 0          | 6         | 1        | 6          | 0          | 0         | 2         |

Supplemental Table 13: Position of variant as compared to driver gene vs. class of kataegis cluster.

A) Only variants annotated to driver genes by ANNOVAR (14774 SNVs)

|                                                |                 |       | SNV classification |                           |          |          | Row sums |
|------------------------------------------------|-----------------|-------|--------------------|---------------------------|----------|----------|----------|
|                                                |                 |       | Single SNVs        | Class of kataegis cluster |          |          |          |
| orientation                                    | distance to TSS |       |                    | other                     | CSR-like | SHM-like |          |
| Position of variant as compared to driver gene | upstream        | close | 139                | 178                       | 1        | 691      | 1009     |
|                                                |                 | far   | 0                  | 0                         | 0        | 0        | 0        |
|                                                | Gene body       | close | 1282               | 687                       | 241      | 3734     | 5944     |
|                                                |                 | far   | 5956               | 569                       | 59       | 1199     | 7783     |
|                                                | downstream      | close | 0                  | 0                         | 0        | 0        | 0        |
|                                                |                 | far   | 38                 | 0                         | 0        | 0        | 38       |
| Column sums                                    |                 |       | 7415               | 1434                      | 301      | 5624     | 14774    |

B) Also considering variants which are intergenic and annotated to antisense transcripts (26702 SNVs)

|                                                |                 |       | SNV classification |                           |          |          | Row sums |
|------------------------------------------------|-----------------|-------|--------------------|---------------------------|----------|----------|----------|
|                                                |                 |       | Single SNVs        | Class of kataegis cluster |          |          |          |
| orientation                                    | distance to TSS |       |                    | other                     | CSR-like | SHM-like |          |
| Position of variant as compared to driver gene | upstream        | close | 324                | 228                       | 7        | 850      | 1409     |
|                                                |                 | far   | 5787               | 89                        | 6        | 58       | 5940     |
|                                                | Gene body       | close | 1502               | 1002                      | 293      | 4885     | 7682     |
|                                                |                 | far   | 6313               | 585                       | 59       | 1204     | 8161     |
|                                                | downstream      | close | 1                  | 0                         | 0        | 18       | 19       |
|                                                |                 | far   | 3421               | 43                        | 6        | 21       | 3491     |
| Column sums                                    |                 |       | 17348              | 1947                      | 371      | 7036     | 26702    |
